# Supplementary material for: Heterogeneity in spontaneous sleep arousals: positive and negative links with early amyloid-beta and cognition
Source: Research Square preprint supplement (doi:10.21203/rs.3.rs-271256/v1), 2021-03-03
Supplement: Supplementary file 1 [file 9a33f65e85c3f66904cfa90c.pdf]

# **Heterogeneity in spontaneous sleep arousals: positive or negative links with early amyloid-beta and cognition**

**Authors:** Daphne O. Chylinski<sup>1†</sup>, Maxime Van Egroo<sup>1,2†</sup>, Justinas Narbutas<sup>1,3†</sup>, Ekaterina Koshmanova<sup>1</sup>, Christian Berthomier<sup>4</sup>, Pierre Berthomier<sup>4</sup>, Marie Brandewinder<sup>4</sup>, Eric Salmon<sup>1,3,5</sup>, Mohamed A. Bahri<sup>1</sup>, Christine Bastin<sup>1,3</sup>, Fabienne Collette<sup>1,3</sup>, Christophe Phillips<sup>1,6</sup>, Pierre Maquet<sup>1,5</sup>, Vincenzo Muto<sup>1</sup> & Gilles Vandewalle<sup>1\*</sup>

## **Online supplementary materials**

Table S1. Post-hoc comparisons of the relative power for each arousal type within each frequency band

Table S2. Output of the GLMM with A $\beta$  burden as dependent variable, and arousal types

Fig. S1. Absence of significant correlation between T-E+ arousals and T+E- arousals

Fig. S2. Association between number of awakenings and cognition

Fig. S3. Association between WASO and cognition

Fig. S4. Association between early cortical A $\beta$  burden and sleep macrostructure fragmentation

| <i>Contrast1</i> |          | <i>Contrast2</i> |          | <i>Frequency band</i> |                  |                |              |                |                  |
|------------------|----------|------------------|----------|-----------------------|------------------|----------------|--------------|----------------|------------------|
|                  |          |                  |          | <i>Theta</i>          |                  | <i>Alpha</i>   |              | <i>Beta</i>    |                  |
| <i>E</i>         | <i>T</i> | <i>E</i>         | <i>T</i> | <i>t value</i>        | <i>Adj p</i>     | <i>t value</i> | <i>Adj p</i> | <i>t value</i> | <i>Adj p</i>     |
| -                | -        | -                | +        | -1.03                 | 0.73             | -2.02          | 0.18         | <b>-10.26</b>  | <b>&lt;.0001</b> |
| -                | -        | +                | -        | 1.99                  | 0.19             | 0.01           | 1.00         | <b>-18.92</b>  | <b>&lt;.0001</b> |
| -                | -        | +                | +        | <b>4.08</b>           | <b>0.0003</b>    | -0.35          | 0.99         | <b>-20.91</b>  | <b>&lt;.0001</b> |
| -                | +        | +                | -        | <b>3.30</b>           | <b>0.006</b>     | 2.02           | 0.18         | <b>-11.41</b>  | <b>&lt;.0001</b> |
| -                | +        | +                | +        | <b>5.11</b>           | <b>&lt;.0001</b> | 1.39           | 0.51         | <b>-12.73</b>  | <b>&lt;.0001</b> |
| +                | -        | +                | +        | <b>2.61</b>           | <b>0.005</b>     | -0.43          | 0.97         | <b>-3.29</b>   | <b>0.006</b>     |

**Table S1. Post-hoc comparisons of the relative power for each arousal type within each frequency band.** T: arousal associated (T+) or not (T-) with sleep stage transition; E: arousal associated (E+) or not (E-) with an increase in EMG tone. Indexes correspond to hourly prevalence. Significant associations are in bold.

|                                   | <i>Age</i>                                                                  | <i>Sex</i> | <i>T-E-</i> | <i>T-E+</i>                   | <i>T+E-</i> | <i>T+E+</i> |
|-----------------------------------|-----------------------------------------------------------------------------|------------|-------------|-------------------------------|-------------|-------------|
| <i>A<math>\beta</math> burden</i> | F = 11.98                                                                   | F = 2.11   | F = 0.00    | F = 15.22                     | F = 3.22    | F = 2.02    |
|                                   | p = 0.0008                                                                  | p = 0.15   | p = 0.99    | p = 0.0002                    | p = 0.076   | p = 0.16    |
|                                   | R <sup>2</sup> $\beta$ *=0.11                                               |            |             | R <sup>2</sup> $\beta$ *=0.14 |             |             |
|                                   | T-E+ T+E- contrast: t = -2.71, p = 0.008, adjusted =0.048, estimate = -2.87 |            |             |                               |             |             |

**Table S2. Output of the GLMM with A $\beta$  burden as dependent variable, and arousal types.**

All F tests had 1 (main effect) and 93 (error) degrees of freedom. Significant associations are in bold and are accompanied by their corresponding Semi-partial R<sup>2</sup> (R<sup>2</sup> $\beta$ \*).

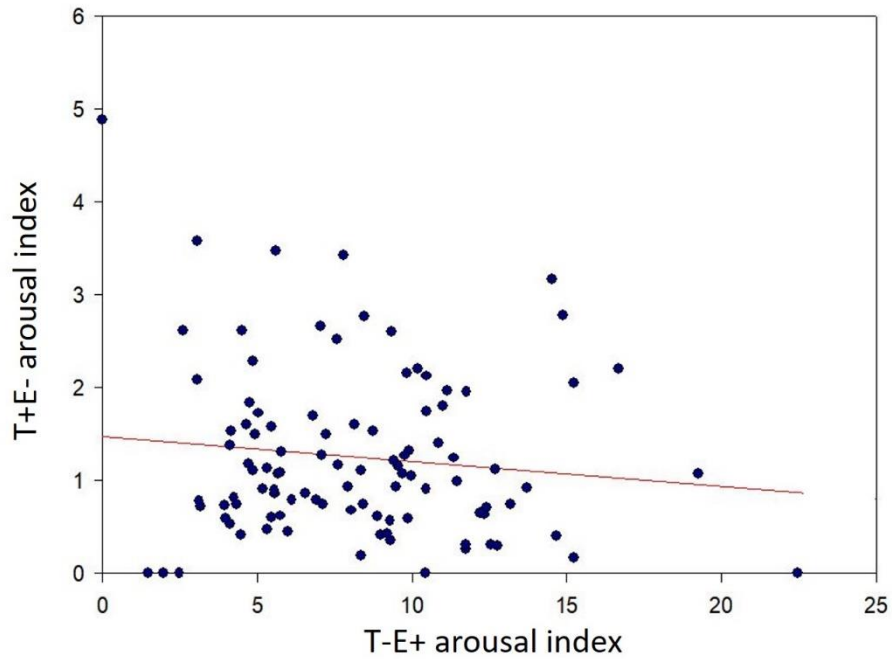

**Fig. S1. Absence of significant correlation between T-E+ arousals and T+E- arousals (Pearson  $r=-.12$   $p=.24$ ).** T: arousal associated (T+) or not (T-) with sleep stage transition; E: arousal associated (E+) or not (E-) with an increase in EMG tone. Indexes correspond to hourly prevalence.

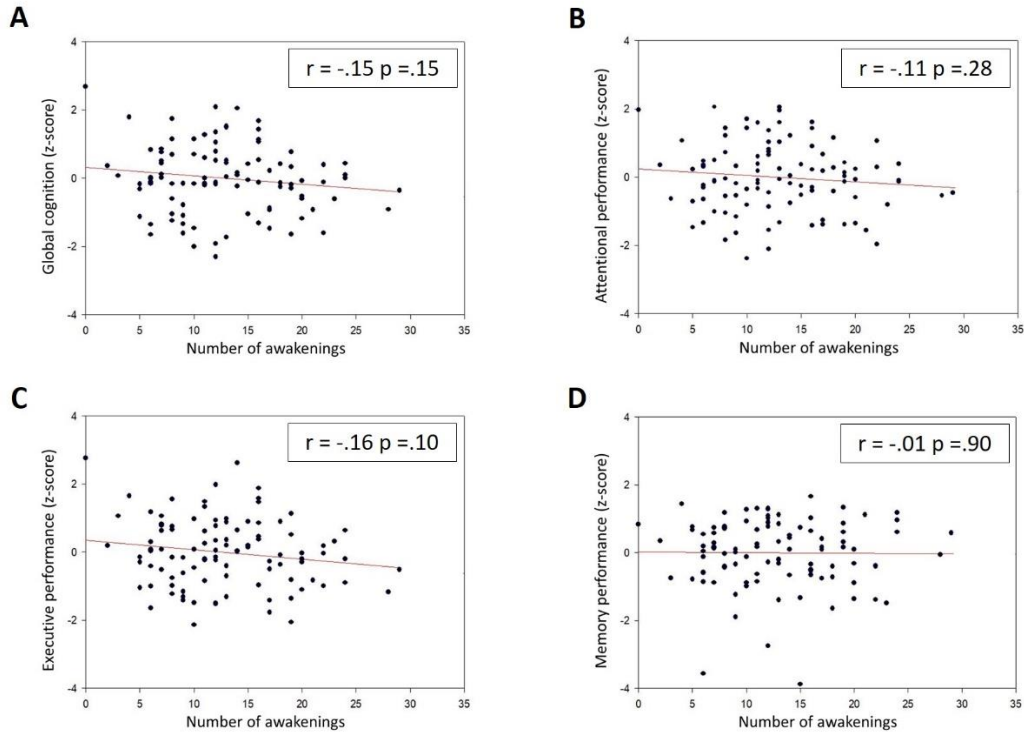

**Fig. S2. Association between number of awakenings and cognition.** (A) Global cognitive performance (Pearson  $r = -0.15$ ,  $p = 0.15$ ; GLMM  $F_{1,95} = 2.21$ ,  $p = 0.14$ ); (B) attentional (Pearson  $r = -0.11$ ,  $p = 0.28$ ; GLMM  $F_{1,95} = 0.89$ ,  $p = 0.35$ ); (C) executive (Pearson  $r = -0.16$ ,  $p = 0.10$ ; GLMM  $F_{1,95} = 3.53$ ,  $p = 0.06$ ); (D) memory performances (Pearson  $r = -0.01$ ,  $p = 0.90$ ; GLMM  $F_{1,95} = 0.00$ ,  $p = 0.98$ ). Inserts correspond to Pearson's  $r$  and associated  $p$ -values.

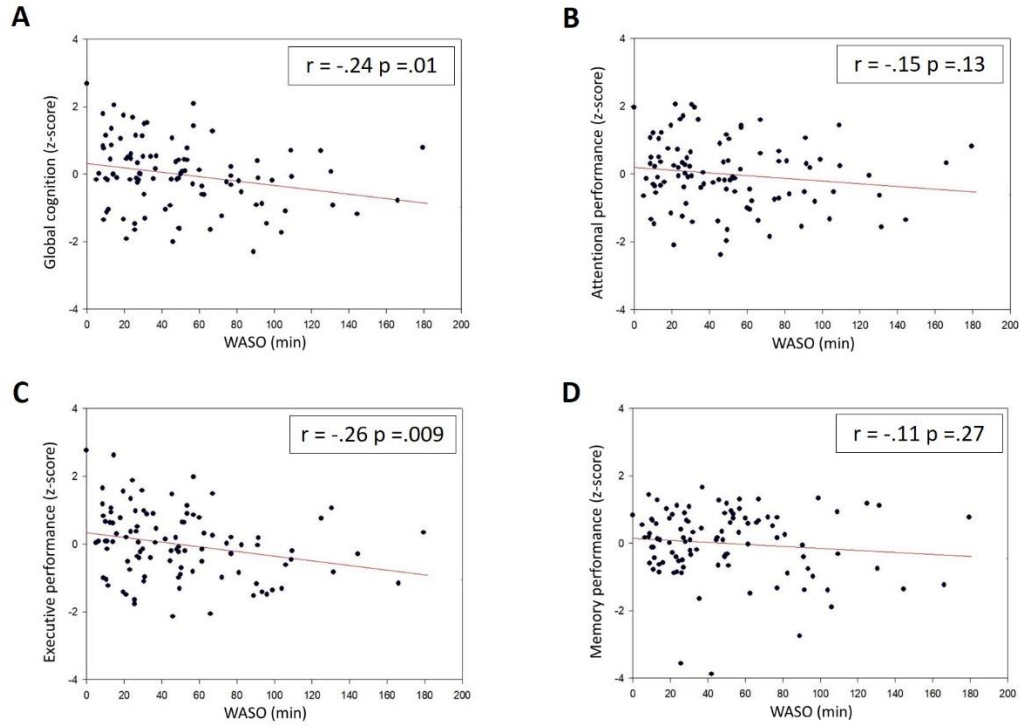

**Fig. S3. Association between WASO and cognition.** (A) Global cognitive performance (Pearson:  $r = -0.24$ ,  $p = 0.01$ ; GLMM  $F_{1,95} = 4.66$ ,  $p = 0.03$ ); (B) attentional (Pearson:  $r = -0.15$ ,  $p = 0.13$ ; GLMM:  $F_{1,95} = 0.56$ ,  $p = 0.46$ ); (C) executive (Pearson:  $r = -0.26$ ,  $p = 0.009$ ; GLMM:  $F_{1,95} = 7.58$ ,  $p = 0.007$ ); (D) memory performances (Pearson:  $r = -0.11$ ,  $p = 0.27$ ; GLMM:  $F_{1,95} = 1.11$ ,  $p = 0.30$ ). Inserts correspond to Pearson's  $r$  and associated  $p$ -values.

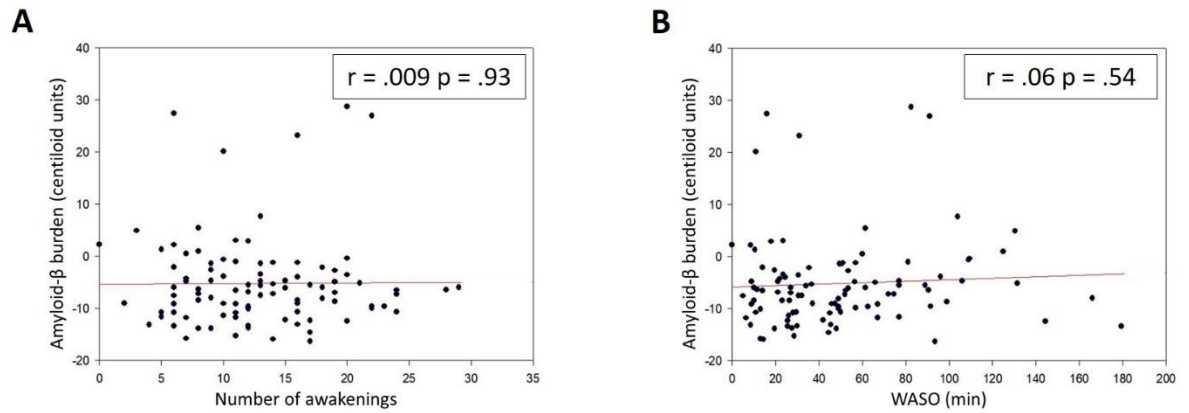

**Fig. S4. Association between early cortical Aβ burden and sleep macrostructure fragmentation.** (A) Association between number of awakenings and early cortical Aβ burden (Pearson:  $r=0.009$ ,  $p=0.93$ ; GLMM  $F_{1,95}=0.22$ ,  $p=0.64$ ); (B) association between WASO and early cortical Aβ burden (Pearson:  $r=0.06$ ,  $p=0.54$ ; GLMM  $F_{1,95}=0.05$ ,  $p=0.83$ ) (panel B). Inserts correspond to Pearson's  $r$  and associated  $p$ -values.
